# Supplementary material for: Electrochemical signature of mismatch in overhang DNA films: a scanning electrochemical microscopic study
Source: Royal Society of Chemistry journal article supplement (doi:10.1039/c3an36810f), 2013-01-01
Supplement: c3an36810f.pdf [file c3an36810f.pdf]

Supporting Information

# Electrochemical signature of mismatch in overhang DNA films by scanning electrochemical microscopy

Mohtashim H. Shamsi<sup>a</sup>, Heinz-Bernhard Kraatz<sup>a,b,\*</sup>

<sup>a</sup> Department of Physical and Environmental Sciences, University of Toronto Scarborough, 1265 Military Trail, Toronto, Ontario M1C 1A4, Canada

<sup>b</sup> Department of Chemistry, University of Toronto, 80 St. George street, Toronto, Ontario, M5S 3H6, Canada

\* Corresponding author at: Department of Physical and Environmental Sciences, University of Toronto Scarborough, 1265 Military Trail, Toronto, Ontario M1C 1A4, Canada Phone: +1 416 287 7278, Fax: +1 416 287 7279, Email: bernie.kraatz@utoronto.ca (H.-B. Kraatz)

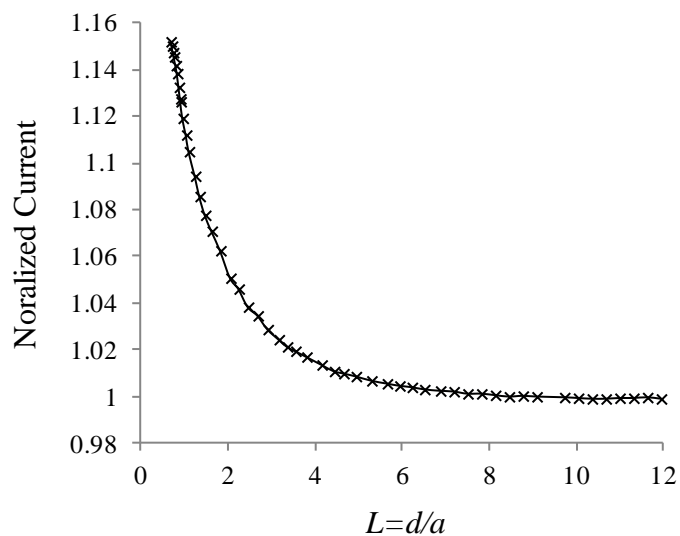

**Figure S1.** Approach curve on bare gold surface. Normalized current (ratio of tip current and tip current at infinity) vs Normalized distance (ratio of distance between tip and substrate and the radius of tip).

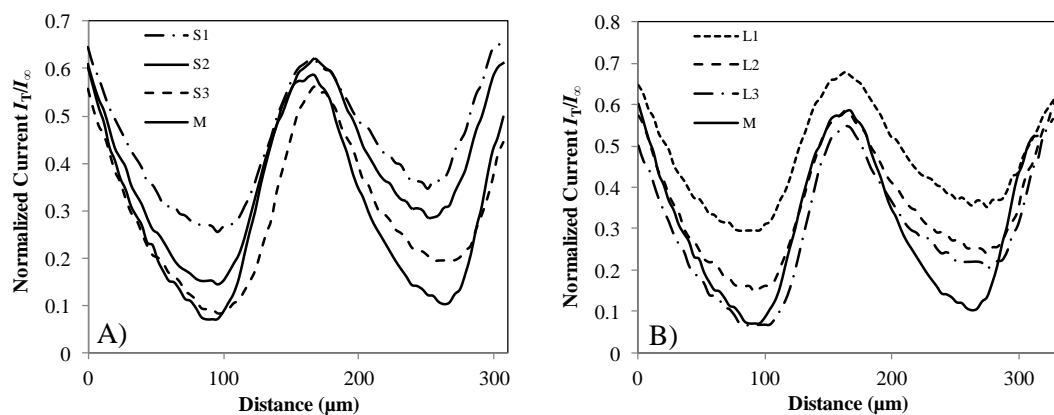

**Figure S2.** Current profiles extracted from the images of DNA duplexes presented in Fig. 2 in main text. (A) Normalized current vs. distance extracted from image Fig. 2A. (B) Normalized current vs. distance extracted from image Fig. 2B. In each profile, left: decrease in current for matched DNA films; right: decrease in current for mismatched DNA films except the solid line for ‘M’. Lower current corresponds to high color intensity in image.

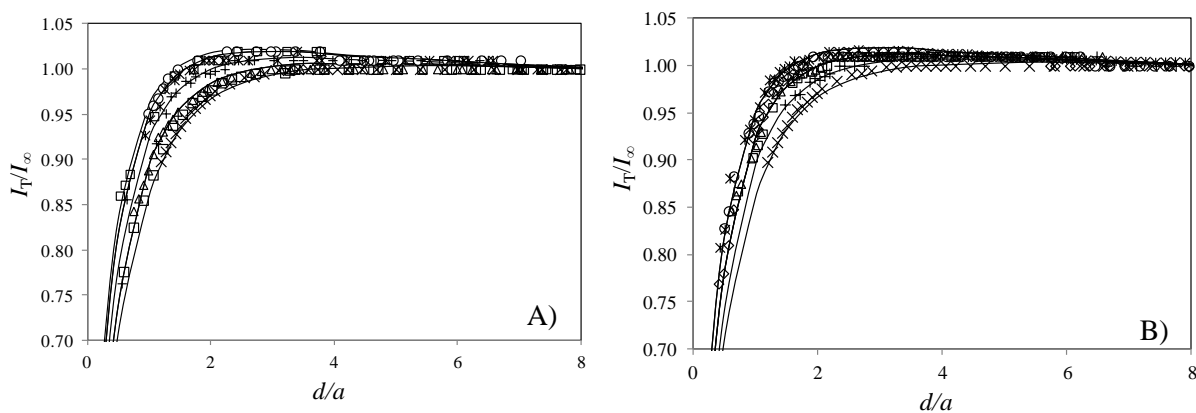

**Figure S3.** Approach curves for matched and mismatched ds-DNA films S1-S3 (A) and L1-L3 (B).
